# 1 Recombinant vector vaccines and within-host evolution

2 *James Bull and Scott L. Nuismer and Rustom Antia*

3 *04/II/2019*

## 4 **Abstract**

5 Many recombinant vector vaccines are capable of replication within the host. They consist of a  
6 fully competent vector backbone engineered to express an antigen from a foreign transgene. From the  
7 perspective of viral replication, the transgene is not only dispensable but may even be intrinsically  
8 detrimental. Thus vaccine revertants that delete the transgene may evolve to dominate the within-  
9 host population and in doing so reduce the antigenicity of the vaccine. We apply mathematical and  
10 computational models to study this process, including the dynamics of vaccine and revertant growth  
11 plus the dynamics of innate and adaptive immunity. Although the selective basis of vaccine evolution is  
12 easy to comprehend, the immunological consequences are not. One complication is that, despite possible  
13 fitness differences between vaccine and revertant, the opportunity for vaccine evolution is limited by the  
14 short period of growth before the viral population is cleared. Even less obvious, revertant *per se* does not  
15 interfere with immunity to vaccine except as the revertant suppresses vaccine abundance; the magnitude  
16 of this interference depends on mechanisms and timing of viral suppression. Adaptive immunity targeting  
17 the foreign antigen is also a possible basis of vaccine inferiority, but it is not worsened by vaccine evolution.  
18 Overall, we find that within-host vaccine evolution can sometimes matter to the adaptive immune response  
19 targeting the foreign antigen, but even when it does matter, simple principles of vaccine design and the  
20 control of inoculum composition can largely mitigate the effects.

## 21 **Author Summary**

22 Recombinant vector vaccines are live replicating viruses that are engineered to carry extra genes derived from  
23 a pathogen – and these produce proteins against which we want to generate immunity. These genes may  
24 evolve to be lost during the course of replication within an individual, and there is a concern that this can  
25 severely limit the vaccine’s efficacy. The dynamics of this process are studied here with mathematical models.  
26 The potential for vaccine evolution is somewhat reduced by the short-term growth of the vaccine population  
27 before it is suppressed by the immune response. Even when within-host evolution can be a problem, the

28 models show that increasing the vaccine inoculum size or ensuring that the inoculum is mostly pure vaccine  
29 can largely avoid the loss of immunity arising from evolution.

### 30 **Key Words:**

31 innate immunity, adaptive immunity, viral population, model, transgene, antigen

## 32 **1. Introduction**

33 Live vaccines replicate within the host. As true of any reproducing population, these within-host vaccine  
34 populations may evolve. In the absence of vaccine transmission, any within-host evolution is a dead end  
35 and might thus seem to be irrelevant to vaccine function. But if the process is fast enough, or the vaccine  
36 population replicates long enough, the vaccine population may evolve to a state where it is ineffective or  
37 virulent – either change would be bad.

38 The two main types of live viral vaccines are attenuated and recombinant-vector vaccines. Most live virus  
39 vaccines in current use are attenuated, their reduced virulence typically achieved by adapting the wild-type  
40 virus to a new environment (e.g. replication in a novel cell line or low temperature), with a consequent  
41 reduced replication in humans. The use of attenuated vaccines is too risky for pathogens such as HIV, and a  
42 safer alternative is to develop a live, recombinant vector vaccine where one or a few virus antigens (proteins  
43 that elicit protective immunity) are expressed from a benign virus vector.

44 Table 1: Consequence of evolution for traditional live attenuated and recombinant vector vaccines

| Factor            | Attenuated vaccine         | Recombinant-vector vaccine |
|-------------------|----------------------------|----------------------------|
| type of evolution | reversion toward wild-type | loss of insert             |
| virulence         | higher virulence           | little change in virulence |
| immunity          | possible increase          | possible reduction         |
| transmission      | increase                   | no effect or increase      |

45 The expected consequences of within-host evolution differ between these two types of vaccines (Table 1).  
46 Evolution of an attenuated vaccine is likely to be a reversion toward the wild-type state, the rate of this

47 process depending heavily on vaccine design and the duration of vaccine virus replication in the host [1].  
48 To a first approximation, reversion toward the wild-type state should lead to the vaccination more closely  
49 resembling natural infection [2], such as higher virus densities, side-effects and disease, and possibly an  
50 increased immune response. Within-host evolution of an attenuated vaccine might also predispose the virus  
51 to better transmission – also reflecting the wild-type state – but this outcome is not assured: viral adaptation  
52 to different tissues within the host may hamper growth in and dissemination from tissues important in  
53 transmission [3].

54 The expected consequences for evolution of a recombinant-vector vaccine are fundamentally different [4].  
55 In most cases, the antigen against which immunity is sought comes from a foreign transgene inserted into a  
56 competent viral vector. The vector genome carries out all viral amplification and transmission functions,  
57 and the transgene does not contribute to any process benefiting vector reproduction. From an evolutionary  
58 perspective, the transgene is both dispensable and potentially costly: selection may favor loss of the transgene  
59 and thus loss of vaccine's ability to elicit immunity against the antigen encoded by the transgene. This  
60 evolution therefore generates something akin to infection by the wild-type vector. As vectors are typically  
61 chosen to be avirulent, vaccine evolution will result in no more than a harmless infection that does not  
62 generate immunity to the antigen encoded by the transgene.

63 Considerable attention has recently been given to the evolution of attenuated vaccines and designs that  
64 retard their evolution. Evolutionary stability of attenuated vaccines seems attainable by engineering designs,  
65 including the introduction of hundreds of silent codon changes, genome rearrangements, and some types of  
66 deletions [1,5,6]. Far less thought has gone into the consequences of evolution for recombinant vector vaccines  
67 or of strategies to minimize this evolution.

68 Although recombinant vector vaccines are not yet in widespread use, many are under development [7,8],  
69 and their success may rest on understanding within-host evolution. Here we explore how even dead-end,  
70 within-host evolution could affect the immune responses elicited by a recombinant vector vaccine and reduce  
71 its efficacy. We consider viral vaccines and focus on those that cause short-duration (acute) infections.  
72 However, the ideas we discuss apply to live vaccines of bacteria and other pathogens.

73 Our overall message is that while vaccine evolution may occur it is either unlikely to be a problem (i.e.,  
74 compromise the generation of immunity), or it is easily mitigated. When vaccine evolution does limit the  
75 adaptive immune response, we identify ways of escaping such outcomes. Our analysis rests on mathematical

76 models, but most results can be explained intuitively (perhaps only in hindsight), with the main results  
77 illustrated graphically; many analyses are relegated to supplementary material. Our analysis assumes that  
78 vaccines replicate within the host until cleared by host immunity; we exclude vaccines that reproduce for  
79 just a single infection cycle (e.g., Modified Vaccinia Virus Ankara), as they have no significant opportunity  
80 for evolution.

## 81 **2. Why the problem is not simple: preliminaries**

82 The key question is whether evolution of the vaccine virus (henceforth just ‘vaccine’) meaningfully affects  
83 immunity to the foreign antigen encoded by the transgene (henceforth just ‘antigen’). The potential for  
84 vaccine evolution is easy to understand. Through mutation, any large vaccine population will contain mutants  
85 that inactivate or delete the foreign transgene, and those revertants will then grow amidst the vaccine. Vaccine  
86 inferiority may accrue in two different ways: the transgenic insert and its expression may intrinsically impair  
87 vaccine growth, and adaptive immunity to the foreign antigen may impair the vaccine’s growth but not the  
88 revertant’s.

89 It is easy to appreciate how and why the vaccine may be inferior to the revertant, and this can result in an  
90 increase in frequency of the revertant. However, the relationship between this evolution and the extent of  
91 immunity to the vaccine antigen is more complex. We thus explain some of the factors that affect how this  
92 evolution translates into a reduction in immunity to the antigen, and why in some circumstances, substantial  
93 evolution can result in little change in immunity to the antigen, while in different situations it can result in a  
94 substantial reduction.

95 *Duration of infection limits evolution.* The revertant may have a higher growth rate because the engineered  
96 viral vaccine carries extraneous genetic cargo (termed *intrinsic* fitness differences). During viral growth, any  
97 fitness difference means that the revertant frequency will increase with time (Fig. 1). However, the vaccine  
98 gives rise to an acute infection which has a short duration, thus limiting the possible extent of evolution. The  
99 short duration is in fact the principle factor limiting evolution.

100 *Evolution versus immunity.* Even more fundamentally, vaccine evolution need not reduce the immune response.  
101 If overgrowth by revertant does not interfere with vaccine growth, then antigen production is not affected  
102 (Fig. 1). Evolution affects antigen production only to the extent that revertant superiority suppresses vaccine

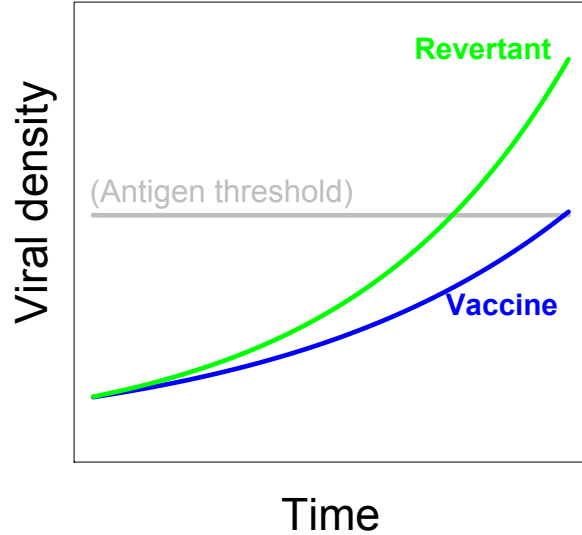

Figure 1: Independent growth of vaccine (blue) and revertant (green). The revertant virus has the superior growth rate, but in the absence of interference between the two, vaccine growth is unimpeded and immunity is triggered.

103 growth and thereby suppresses antigen production.

104 The challenges are thus to understand (i) when and how much vaccine evolution occurs; (ii) whether and to  
105 what extent that evolution affects the abundance of vaccine virus; and (iii) the extent to which change in the  
106 vaccine abundance affects the generation of adaptive immunity against the antigen. The arguments presented  
107 above are qualitative and only superficially identify the scope of the problem. Quantitative understanding  
108 ultimately rests on analysis of mathematical models. However, as the models have many interacting processes  
109 – minimally innate immunity, adaptive immunity and intrinsic growth differences between vaccine versus  
110 revertant – we first verbally explain the biology underlying the processes that go into those models.

### 111 **3. Bases and consequences of vaccine inferiority**

112 An intrinsic fitness difference between the vaccine and the wild-type vector is expected (or at least not  
113 surprising) because the transgene is non-essential and has no evolutionary history with the vector genome.  
114 Thus, the insertion can be disruptive, and the resulting antigen expression may interfere with vector functions.

115 Perhaps surprisingly, therefore, an observation of intrinsic vaccine inferiority is not necessarily the norm.  
116 Populations of recombinant viruses are commonly stable in culture, at least for a few transfers [9–20], but  
117 potentially indefinitely [21,22]. Of course, short term population retention of antigen expression may mask an  
118 underlying long term instability, so most of these observations merely set limits on the possible magnitude of  
119 inferiority. Yet even if vaccine selective ‘neutrality’ turns out to be fleeting, merely a mistaken impression  
120 from short-term observations, we will find that the phenomenon of short-term stability mirrors a solution to  
121 minimize vaccine evolution within the host.

122 Fig. 1 presented a hypothetical case in which evolutionary superiority of revertant did not suppress vaccine  
123 growth, hence evolution had little effect on antigen production. That process was one in which there was no  
124 interference between vaccine and revertant growth. Evolution does become important to antigen levels if  
125 vaccine and revertant interfere with either so that vaccine growth is depressed by the revertant, or if the  
126 duration of infection of the vaccine strain is reduced. In either case the revertant will then suppress antigen  
127 levels. Again, the problem is complicated by the limited duration of the infection: reduced antigen production  
128 due to vaccine evolution depends not only on interference between the two genomes but also on overall growth  
129 and the extent to which it affects the level of immunity to vaccine and vector. A mechanism that forces  
130 interference between vaccine and revertant can also limit the total amount of viral growth, thereby limiting  
131 evolution.

132 Evolution of vaccine versus revertant thus depends on details, in particular, the specific mechanism by which  
133 revertant interferes with vaccine growth. We describe three different mechanisms that have been proposed:  
134 innate immunity, resource limitation, and adaptive immunity to vector components. For many vaccines, each  
135 mechanism will impede revertant and vaccine equally as a collective population, thus ensuring interference.

### 136 **3.1 Three mechanisms of vaccine-revertant interference**

137 It was initially believed, implicitly if not explicitly, that the adaptive immune response played the dominant  
138 role in the control of viruses and other infections. In the 1990’s, Janeway and Medzhitov identified shared  
139 pathways for the control of pathogens between vertebrates and *Drosophila*, even though *Drosophila* lacks  
140 an adaptive response [23]. This led to a resurgence of interest in the role of innate immunity in the initial  
141 control of infections. Later modeling studies of influenza infections suggested yet another mechanism, that  
142 the dynamics of these infections could be largely described by simple resource limitation models, of the type

143 used in ecology for population growth [24,25]. The realization that all three different processes might suppress  
144 viral infection led to more careful examination of the roles of different factors in the early control of acute  
145 infections [26–29]. The relative role of each mechanism in clearing infections is the basis of ongoing discussion,  
146 but it is widely accepted that the roles differ among infections by different viruses and that each mechanism  
147 is potentially important for some viruses.

148 **Innate immunity** There are two broad arms of immunity for suppressing vaccine growth within the host, the  
149 innate and the adaptive immune responses. Innate immunity is triggered by conserved molecules associated  
150 with pathogens [23]. Conserved structures of pathogens targeted by innate immunity include dsRNA,  
151 frequently accompanying viral replication, plus lipopolysaccharides and endotoxins of bacteria [30]. Because  
152 innate immunity involves the activation of a standing population of immune cells such as macrophages and  
153 dendritic cells, or triggering of the complement pathway, it can be elicited much more rapidly than the  
154 adaptive response; the latter requires many rounds of clonal expansion of rare antigen-specific cells to generate  
155 a population large enough to control the infection [31]. Furthermore, recent studies have shown that the  
156 innate response is required for the initial stimulation of the adaptive response [32]. Thus, innate immunity  
157 has a major role in early suppression of the viral population. Innate immunity can suppress both vector and  
158 vaccine, and it is not likely to discriminate between two genomes that differ by a single, non-essential gene  
159 (the transgene).

160 **Resource limitation** Another way in which virus infection can be controlled prior to the generation of  
161 adaptive immunity is resource limitation. Both the vaccine and revertant virus use the same resource  
162 (susceptible host cells). Resource limitation can control the infection if the virus depletes this resource,  
163 whereby the rate of virus output falls below its intrinsic death rate [24]. Like innate immunity, resource  
164 limitation is expected to affect vaccine and revertant similarly.

#### 165 **Adaptive immunity.**

166 Adaptive immunity can be induced by the wild-type vector and the vaccine virus. Adaptive immune responses  
167 specific to antigens expressed by the wild-type vector will presumably affect the vaccine and revertant equally  
168 – because the vaccine encodes a complete vector genome, and the revertant is also a complete vector. As with  
169 the preceding pair of mechanisms, adaptive immunity common to both revertant and vaccine will operate so  
170 that revertant abundance will depress vaccine. Adaptive immunity to the vaccine antigen will be considered  
171 shortly.

172 All three interference mechanisms will potentially operate in any vaccinated host. With all three operating,  
173 one mechanism may take precedence over the others, simply because it is activated earlier or enforces a lower  
174 limit on viral density than the others. However, there are different stages or degrees of vaccine suppression,  
175 so an early mechanism may act to control the infection without clearing it, and another mechanism may  
176 act later to clear. Because of the delay in developing an adaptive response, viral suppression by adaptive  
177 immunity typically occurs later than effects of innate immunity or resource limitation and so might seem  
178 to be unimportant in vaccine evolution. Yet adaptive immunity may be important in clearing the vaccine  
179 following control by other mechanisms, in which case it could have an important role in vaccine evolution.

### 180 **3.2 Adaptive immunity to the vaccine antigen may also contribute to vaccine** 181 **inferiority – and feed back to inhibit itself**

182 The preceding paragraphs omitted adaptive immunity to the antigen. By its very nature, adaptive immunity  
183 suppresses vaccine growth. But adaptive immunity to the antigen is specific to the vaccine and is thus  
184 another reason – besides intrinsic fitness effects – that the vaccine may have lower fitness than revertant.  
185 The evolutionary consequences should be the same for both types of inferiority, reducing the long term  
186 generation of antigen levels. But the interesting twist is that adaptive immunity to the antigen might feed  
187 back negatively on itself to limit its own growth – immunity against a virus is intrinsically inhibitory, so  
188 adaptive immunity against the vaccine will limit vaccine growth and thus limit antigen build-up that would  
189 fuel further immunity. One question is whether this self-inhibition is worsened with vaccine evolution.

190 The effect is biologically complicated because adaptive immunity to the antigen does not necessarily translate  
191 into selection against the vaccine. Selection against the vaccine *per se* operates only when adaptive immunity  
192 specifically targets the vaccine genome over the revertant genome, and this selection need not occur – either  
193 because adaptive immunity is so delayed that it is never manifest during vaccine growth, or because the  
194 antigen is physically decoupled from its genome when attacked by the adaptive response. Without imposing  
195 selection on the vaccine, antigen-directed immunity will not affect vaccine evolution.



## 196 4. Beyond intuition: a formal model and numerical results

197 We now employ quantitative models to evaluate the intuitive ideas presented above. Given the high  
198 dimensionality of the problem, we are especially interested in how well intuition works and whether generalities  
199 are observed across large regions of parameter space. A flow diagram of the elements and interactions reveals  
200 the complexity of the model (Fig. 2) and facilitates understanding the dynamical equations.  $V$  and  $W$  are the  
201 respective vaccine and revertant densities, with intrinsic growth and death rates governed by four parameters  
202 (not shown). The model also includes variables for resources ( $R$ ), innate immunity ( $Z$ ), adaptive immunity  
203 to vector ( $Y$ ), and adaptive immunity to antigen ( $X$ ) that are both influenced by and influence  $V$  and  $W$   
204 (Fig 2). In the following sections, we explore the dynamics of these interactions with simulations and present  
205 results graphically. Equations and parameter values are provided in the Appendix. Resource limitation and  
206 innate immunity yield qualitatively similar results, so trials with resource limitation are not illustrated in the  
207 main text.

208 The models assist us by forcing us to specify assumptions for how the viruses and immunity interact, and  
209 by allowing us to rigorously explore outcomes in different scenarios. However, there is uncertainty in the  
210 model structure, many parameter values are unknown, and different viruses will behave somewhat differently.  
211 Consequently, we focus on broad generalities that arise from many simulations and illustrate these for a  
212 few specific cases, reserving the supplement for further details. The presentation below briefly discusses  
213 the individual dynamics of individual trials for illustration but then moves to plots that reveal differences  
214 in outcomes as the key parameters are changed. The model used here incorporates the structure of earlier  
215 models used to describe immune responses [33–35]; parameter values used here were chosen as described in  
216 some of these earlier studies.

### 217 4.1 Evolution from intrinsic fitness effects can matter

218 In the trials used for illustration, we allow innate immunity to control the infection and adaptive immunity  
219 to cause final clearance. Such a scenario might correspond to the dynamics of *Listeria* infection of mice  
220 [31], or the early dynamics of SIV infections [36]. To get a sense of the full dynamics in the model, we show  
221 the time course of dynamics for the different variables (Fig. 3). The left panel plots the dynamics of virus  
222 and immunity in the absence of evolution (revertant absent). The right panel plots two extremes of vaccine  
223 evolution, one slight (solid curves), one strong (dotted curves); vaccine evolution is enhanced by increasing

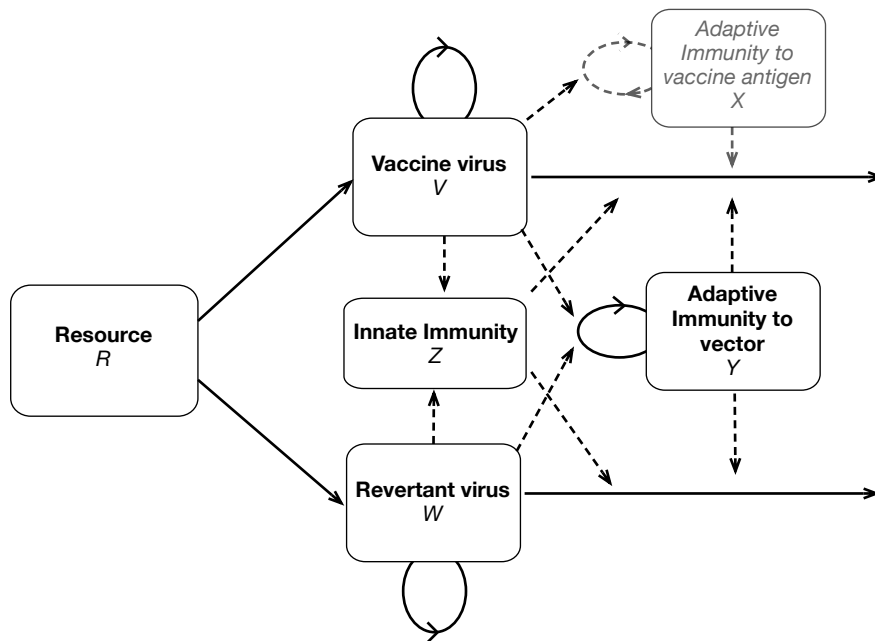

Figure 2: Diagram of model processes and interactions. This figure gives all the processes in the full model that includes resource limitation with innate and adaptive immunity. Solid lines represent variables ( $V$ ,  $W$ ,  $R$ ,  $Z$ ,  $X$ , and  $Y$ ) and dashed lines represent influences. Note that only the top-most box in gray, the specific immune response to the vaccine antigen, acts differentially on the vaccine vs revertant virus. Not all of these components are included in each iteration of the model.

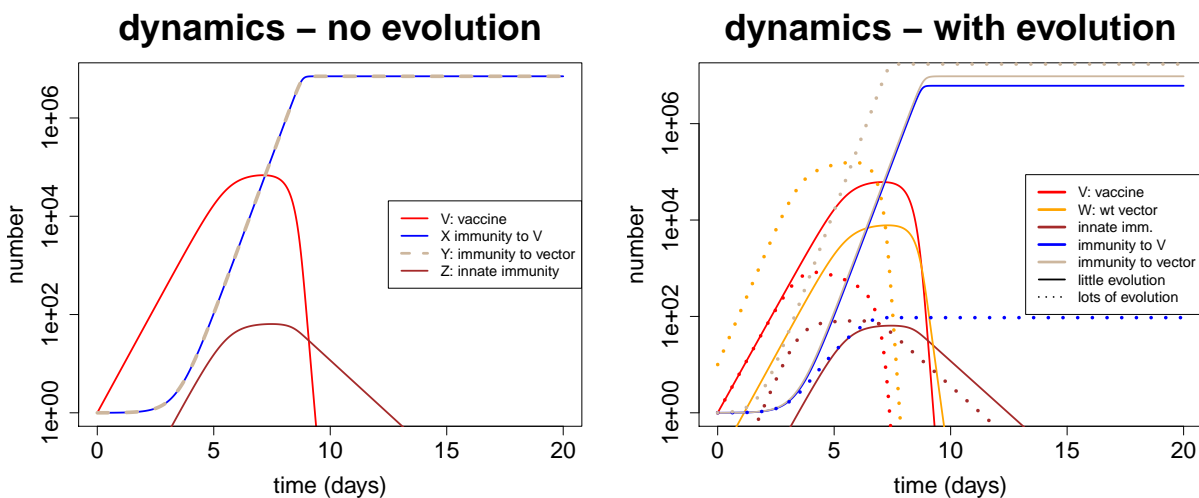

Figure 3: Representative dynamics contrasting vaccine evolution with no evolution. The trials are parameterized so that virus is controlled by innate immunity with final clearance due to adaptive immunity. (Left) The dynamics of virus and immunity are shown in the absence of revertant (i.e. no evolution). (Right) The revertant is included, but at two different levels. The solid lines correspond to little evolution: the vaccine has a small cost (intrinsic cost =1%, initial level of W is 0.1 that of initial vaccine, and the mutation rate is  $10^{-6}$  per day). The dotted lines correspond to major evolution: the vaccine has a 20% intrinsic cost, the mutation rate is  $10^{-3}$ , and the initial level of the revertant is 10 fold that of the vaccine.

224 the mutation rate, the fitness of revertant ( $c$ ) and the initial revertant abundance. The effect of evolution is  
225 seen from a comparison of the dashed and solid curves on the right with each other and a comparison of  
226 those curves with the left panel.

227 Comparing the cases of no evolution with little evolution, the revertant virus does not significantly affect the  
228 dynamics of the vaccine virus or immunity to the vaccine virus (red solid lines in left and right panels are  
229 similar). However, with parameters that result in considerable evolution (high mutation rate, high initial  
230 frequency and large growth advantage for the revertant virus), the vaccine virus is suppressed and cleared  
231 earlier, reducing cumulative lifetime production of vaccine virus, and thus of vaccine antigen and of immunity  
232 to the vaccine antigen.

233 Illustrations of dynamics from individual trials convey many details. However, without a specific empirical  
234 basis for the parameter values chosen, the details have little assured relevance. We therefore provide contour  
235 plots that allow easy comparison of many different trials (Fig. 4). These graphs show the cumulative vaccine  
236 load (left panel) and final level of immunity to vaccine (right) as a function of initial revertant frequencies  
237 and selective advantage of the revertant ( $c$ ). A strong correspondence exists between virus load and the  
238 level of immunity generated, as is observed following infection [37]. (Subsequent figures therefore illustrate  
239 the level of immunity.) The initial composition of the inoculum matters somewhat more to the adaptive  
240 response than does the intrinsic cost of the vaccine (as evident by the contours being closer to vertical rather  
241 than horizontal). When the inoculum is mostly vaccine and revertant fitness is not high, evolution has little  
242 effect on viral load or final level of immunity (i.e., the lower left of each panel has a broad area of one color)  
243 – because of the short duration of infection. Over longer periods of time, the selective advantage of the  
244 revertant plays an increasing role in evolution.

## 245 **4.2 Vaccine evolution driven by adaptive immunity**

246 We focus on infections of short duration. Factors that limit the duration of infection include resource  
247 limitation, and innate and adaptive immunity. For the most part these factors act equally against vaccine  
248 and revertant virus. Only one factor, adaptive immunity to the vaccine antigen ( $X$ ), acts specifically on  
249 the vaccine virus and not the revertant. Intuition suggests that this adaptive immunity to the antigen  
250 can potentially suppress the vaccine's growth and give an advantage to the revertant. As with intrinsic  
251 fitness costs, this selection might feed back to limit vaccine growth and thus limit the development of further

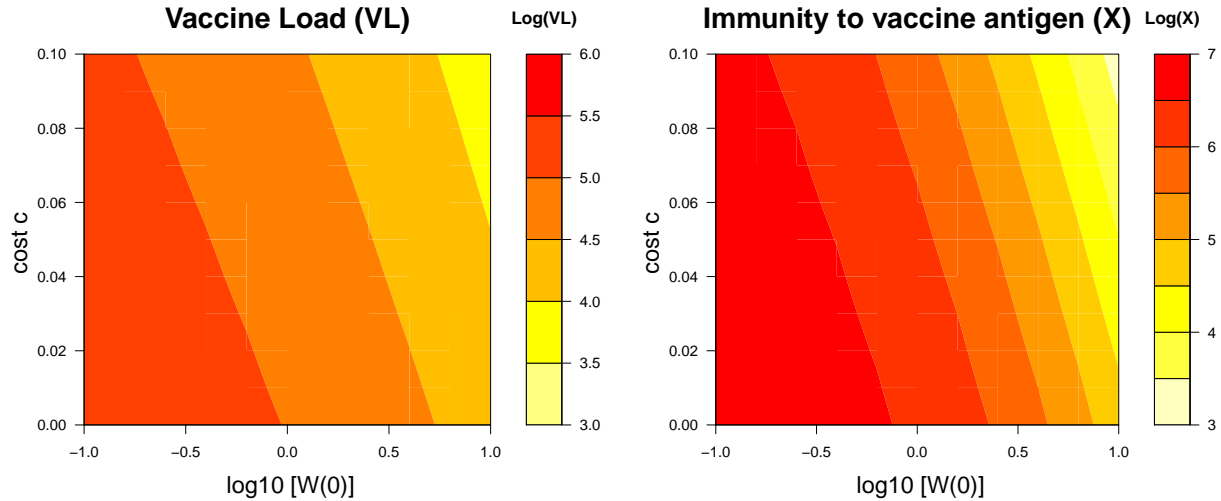

Figure 4: Viral load and the level of immunity to the vaccine antigen depend on evolution. The extent of evolutionary change depends largely on two parameters, the initial abundance of the revertant virus (plotted on the x-axis) and the growth advantage of the revertant (plotted on the y-axis). The heat maps show how, as the extent of evolutionary change increases (as we move to the right or up), there is a reduction in the viral load of the vaccine (defined as  $\int V dt$ , left panel) and in the magnitude of immunity to the vaccine antigen ( $X$ , right panel). The initial amount of vaccine virus is always  $V(0)=1$  ( $\log =0$ ). Note that the graphs span high levels of revertant in the inoculum that should be easily avoided ( $\log W(0) > 1$ ) – if the researcher is alert to the possibility. Parameters as in SI table with: no evolution scenario having  $W(0)=\mu=0$  (left panel); low evolution scenario having  $W(0)=0.01$   $V(0)$ ,  $c = 0.01$ ,  $\mu = 10^{-6}$ ; and high evolution having  $W(0)=10$   $V(0)$ ,  $c = 0.2$ ,  $\mu = 10^{-3}$ .

252 immunity by allowing revertant to grow and interfere with vaccine. This section considers whether these  
253 arguments are supported by the model.

254 Any real vaccine that elicits immunity against the antigen may also experience an intrinsic fitness cost.  
255 The effect of immunity on evolution would then be confounded with the effect of intrinsic fitness effects on  
256 evolution, making it difficult to isolate one from the other. The models do not face this problem, however.  
257 They can be parameterized so that the only possible selection against the vaccine comes from immunity (by  
258 setting  $c = 0$ ). Vaccine populations can also be freed of revertant by omitting revertant from the inoculum  
259 and setting the mutation rate to 0. Thus, we can measure the effect of adaptive immunity on vaccine growth

260 from trials that lack revertant and then compare those results with trials that include revertant.

261 There are several background points to note about the model structure. First, adaptive immunity specific  
262 to vaccine ( $X$ ) develops at a rate proportional to the vaccine abundance ( $V$ ) and parameters  $s$  and  $\phi_X$ .  
263 In contrast the impairment of vaccine growth depends on the level of immunity ( $X$ ) and the parameter  
264 ( $k_X$ ). Thus, immunity can develop even when there is little or no impairment, i.e., when  $k_X \rightarrow 0$ . Second,  
265 adaptive immunity to the vector ( $Y$ ) develops according to its own parameter ( $\phi_Y$ ) in response to vaccine  
266 plus revertant abundance ( $X + Y$ ), and it impairs both vaccine and revertant growth equally by parameter  
267  $k_Y$ . When revertant is present, it will increase the level of immunity to vector backbone/revertant but not  
268 directly affect immunity specific to the vaccine. This immunity will result in faster clearance of both revertant  
269 and vaccine, and this results in decreased immunity to the antigen.

270 Trials were run that contrasted revertant absence versus revertant introduced at 75% of the inoculum – no  
271 evolution versus evolution, respectively (Fig. 5). Absence of the revertant is the baseline against which the  
272 effect of evolution can be compared. The horizontal axis varies  $k_X$ , the parameter for impairment specific to  
273 vaccine, and the vertical axis varies  $k_Y$ , impairment to vector, which affects vaccine and revertant equally. In  
274 both panels, increasing impairment against vaccine leads to lower levels of immunity to the vaccine – this  
275 is the self-limiting effect of adaptive immunity, which exists even in the absence of evolution. As expected,  
276 impairment of vaccine by immunity to vector is also found.

277 A large effect of evolution on vaccine immunity is evident by comparing the left panel (no evolution) and  
278 right panel (evolution): introduction of revertant reduces the level of immunity against vaccine on the order  
279 of 10-fold. For the evolution panel, the revertant is 3/4 the inoculum and has no intrinsic advantage over  
280 vaccine; inoculum size is unchanged. All loss of immunity against vaccine is thus due to revertant in the  
281 inoculum and any selective effect from immunity against vaccine.

282 A question motivating this analysis was one step deeper in the complexity of these effects: does the self-  
283 limiting effect of adaptive immunity worsen with evolution? This question can be answered by comparing  
284 the self-inhibitory effect between left and right panels as  $k_X$  is increased. It is seen that the self-inhibitory  
285 effect is actually somewhat reduced by the revertant. The revertant lowers the response overall, but when  
286 correcting for that difference, the effect of increasing  $k_X$  is weaker in the right panel than in the left. We  
287 attribute this weakening of self-limitation as due to the same effect in Fig. 1: revertant presence becomes  
288 irrelevant as more of the adaptive response to vaccine is controlled by immunity to the vaccine antigen rather

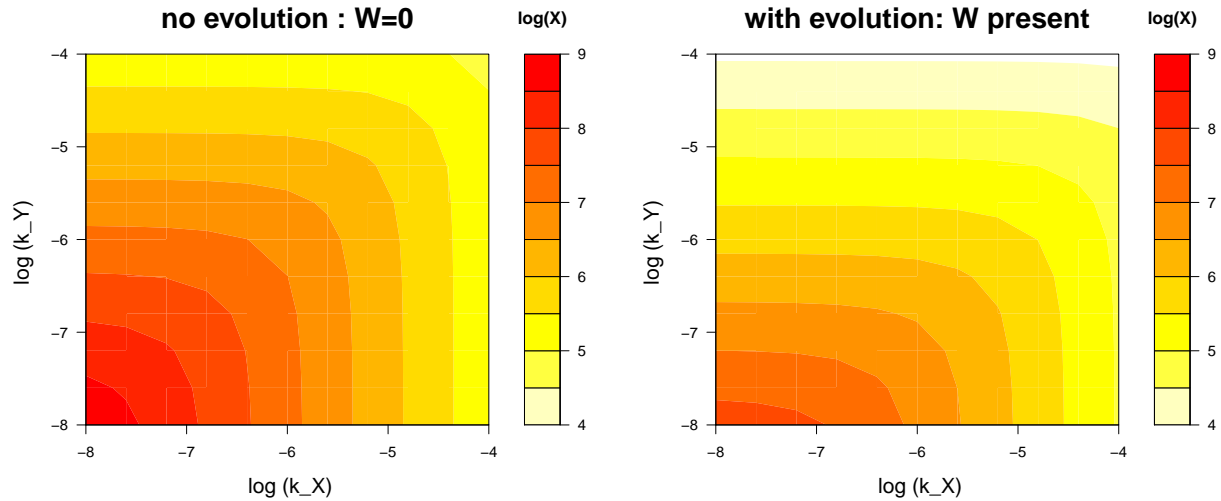

Figure 5: Effect of evolution on the suppression of immunity by impairment parameters. The final level of immunity to the vaccine antigen depends heavily on the parameters  $k_X$  and  $k_Y$  – which describe how immunity to the vaccine and revertant affect virus replication. The left plot considers the absence of revertant, hence no evolution. The right panel introduces revertant at 3/4 the inoculum, with the same total inoculum size as in the left panel. The revertant reduces immunity ( $X$ ), but the effect of increasing  $k_X$  is not made worse by the revertant. Intrinsic fitness differences are absent; mutation of vaccine to revertant is set to 0.

289 than vector – revertant is interfering less.

290 In sum, therefore, immunity to the vaccine ( $X$ ) is reduced by itself and by evolution (presence of revertant).

291 The self-limiting effect of anti-vaccine immunity depends heavily on the impairment parameter. The two  
292 effects do not interact to make the problem worse than from their separate effects.

### 293 4.3 Optimizing the efficacy of a recombinant vector vaccine to avoid effects of 294 evolution

295 Vaccine design can affect the level of immunity specific to its recombinant antigen. This section briefly  
296 consider factors that affect the efficacy of a recombinant vector vaccine in the absence of evolution, then  
297 turns to vaccine designs and administration that improve vaccine efficacy in the presence of evolution.

298 An ideal recombinant vector vaccine would have the following properties. First it should elicit an immune  
299 response that rapidly clears the pathogen (i.e. the rate constant for clearance of the pathogen, call it  $k_P$ ,

300 is high). Second, the vaccine should elicit a large response to this antigen. This requires that the antigen  
301 rapidly elicits immunity (i.e. has low  $\phi_X$ , and in terms of immunology it should be an immunogenic antigen),  
302 and also requires a high vaccine viral load to generate a large response. Engineering this requires tackling  
303 a trade-off between avoiding vaccine clearance (i.e. having a low  $k_X$ ) but allowing for rapid clearance of  
304 the pathogen (having a high  $k_P$ ). Vaccines designed to express the antigen in a form that is different from  
305 that in the pathogen might help solve this problem. Thus, to elicit immunity to influenza, one might design  
306 secreted forms of the hemagglutinin or neuraminidase proteins. A recombinant hemagglutinin protein that is  
307 secreted rather than on the virion surface would prevent the antibody response to this protein from clearing  
308 the recombinant vector vaccine (have low  $k_X$ ) without compromising the clearance of the influenza virus  
309 pathogen which has hemagglutinin on its surface (i.e. has high  $k_P$ ). In this manner our model allows the  
310 identification and tuning of parameters that affect vaccine efficacy, and a comprehensive search of parameter  
311 space would identify ideal combinations of vaccine properties. We now turn to vaccine designs that overcome  
312 problems created by evolution, our specific interest here.

#### 313 4.3.1 Control the inoculum

314 The results above suggest that vaccine evolution is only likely to compromise immunity to the antigen if  
315 there is substantial evolution and this evolution results in more rapid clearance of the vaccine virus. In this  
316 case, one possible solution takes advantage of the short-term nature of vaccine growth: control the inoculum.  
317 Two ways of controlling the inoculum are to control its composition and to control its size. Evolution can  
318 be reduced by purifying the inoculum - an inoculum that is entirely vaccine cannot begin to give way to  
319 revertant until some are generated by mutation, hence a low (or zero) density of revertant in the inoculum  
320 enhances the duration of within-host vaccine utility. If it not feasible to *eliminate* the revertant from the  
321 inoculum, it can nevertheless be beneficial to lower the frequency of the revertant virus in the inoculum.  
322 The effect of revertant frequency in the inoculum is evident in Figure 6: the magnitude of immunity to the  
323 vaccine increases by orders of magnitude as the initial frequency of the revertant is decreased.

324 Evolution can also be reduced by increasing the inoculum size. To achieve a threshold antigen level, a large  
325 inoculum requires less growth than a small one. Less growth means less evolution - in the extreme, a large  
326 enough inoculum requires no vaccine growth, as with killed vaccines. Figure 6 also shows the consequences of  
327 changes in inoculum size. When the revertant frequency in the inoculum is high, increasing the inoculum size



328 appreciably increases the magnitude of immunity; a much reduced benefit is seen when revertant frequency is  
329 low, likely because there is less evolutionary interference from the revertant. These results hint at a potential  
330 tradeoff between the benefits of reducing the frequency of the revertant in the inoculum and increasing the  
331 dose. Consideration of this tradeoff could help choose an economically feasible strategy, since both purifying  
332 the inoculum and increasing its dose are likely to incur financial costs.

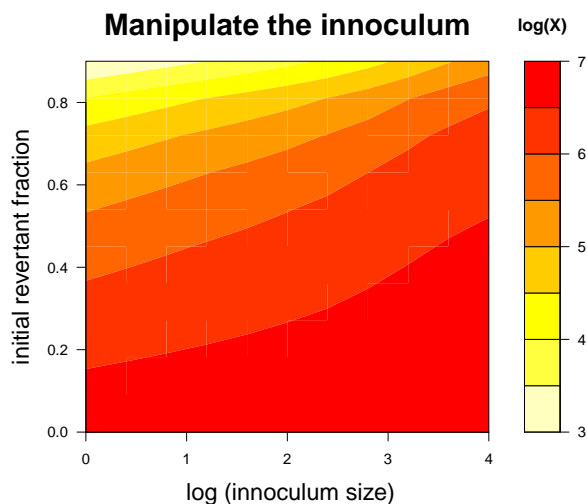

Figure 6: Effects of manipulating the inoculum on immunity to the vaccine. Small inocula that contain vaccine plus revertant are more prone to reduced immunity levels than are large inocula with little revertant. Composition of the vaccine has the larger effect for these parameters, as indicated by the contours being more horizontal than vertical. An intrinsic fitness cost of  $c = 0.1$  was set for these trials. Smaller  $c$  values would lead to higher vaccine and immunity levels across the graphs.

333 Whether and how well controlling the inoculum will work in practice will depend on details. Solutions may  
334 be quantitative rather than absolute. Intuition is useful for guidance but needs to be confirmed by formal  
335 analyses, guided by data for the specific implementation.

#### 336 4.3.2 Design the vaccine

337 Controlling the inoculum corrects the evolution problem by circumventing the consequences of vaccine  
338 inferiority. A different solution is to design the vaccine with less of a disadvantage. The most obvious  
339 realm for this approach is in vaccine engineering: the timing and tissues of antigen expression, location of  
340 the transgene in the vector genome, and the size of the transgene may all influence intrinsic fitness effects

341 [9,10,17,38,39]. Directed evolution approaches might also work: one simple approach in reducing an intrinsic  
342 cost might be to ‘pre-adapt’ the vector *in vitro* on host cells expressing the antigen *in trans*. This adapted  
343 vector would then be used as the vaccine backbone. Another simple approach would be to compete several  
344 different vaccine designs *in vitro* and pick the design with fastest growth. Any approach using *in vitro*  
345 adaptation needs to avoid adapting the vector to the extent that it compromises ability to grow *in vivo*.

## 346 5. Discussion

347 Any live viral vaccine may evolve within the host. The potential for attenuated viruses to revert to wild-type  
348 virulence is well appreciated [1,2], even if it presents a problem for relatively few vaccines (e.g., attenuated  
349 polio: [40]). There is also a potential for live, recombinant vector vaccines to evolve – our focus in this  
350 paper – with the main concern being loss or reduced expression of the transgenic insert [4,41]. If the vaccine  
351 evolution occurs fast enough or the vaccine infection persists long enough, loss of the insert could reduce  
352 vaccine efficacy.

353 We developed and analyzed models to explore ways in which vaccine evolution could lead to a reduction in  
354 vaccine efficacy. An intrinsic fitness advantage of the revertant virus, expected because engineering transgene  
355 expression is likely to have metabolic and other costs, will lead to vaccine being gradually overgrown by  
356 revertant. Yet this is only likely to cause a reduction in the immunity to the vaccine antigen if it leads to a  
357 reduction in the absolute amount (as opposed to merely a reduction in relative frequency) of the vaccine virus.  
358 Ascent of revertant can reduce the amount of the vaccine virus if the revertant uses resources required for  
359 virus replication or the vaccine virus is cleared by the innate or adaptive responses elicited by the revertant.  
360 Our results revealed that that for a broad parameter regime, within-host evolution is unlikely to cause  
361 a significant loss of vaccine efficacy (i.e. reduction in the level of immunity to the inserted transgene).  
362 Furthermore, undesirable consequences of vaccine evolution may often be easily remedied by ensuring the  
363 frequency of the revertant virus in the inoculum is low and by increasing the size of the inoculum. We  
364 also suggest that further gains in vaccine efficacy can be achieved by appropriate engineering of the vaccine  
365 antigen, allowing it to elicit immunity that clears the pathogen but not the virus vaccine, although such  
366 engineering may not be easy.

367 One major outcome of our analysis was that intuition about vaccine evolution was not easily translated into

368 intuition about immunity. Indeed, even intuition about evolution often failed because that intuition was based  
369 on vaccine versus revertant fitness, but the vaccine growth phase was short enough that differential fitness  
370 had little effect on evolution. Even more fundamentally, intuition sometimes failed because the development  
371 of immunity to vaccine could be unaffected by the revertant. Thus, our intuition suggested that vaccine  
372 inferiority could stem from both an intrinsic fitness disadvantage and a disadvantage due to adaptive immunity  
373 to the transgene/antigen. Both effects were found to impair the development of immunity to vaccine, but not  
374 necessarily for the reasons suggested by our intuition.

375 Measuring the intrinsic fitness effect of the transgene is likely to be an important step in vaccine design. For  
376 assessing vaccine evolution, the relevant biological realm is within the host. Nonetheless, *in vitro* growth  
377 environments may reveal much about a vaccine's intrinsic propensity to evolve loss of antigen expression.  
378 There are various ways intrinsic fitness effects and their evolutionary consequences might be studied. Vaccine  
379 growth in tissue culture may reveal some aspects of intrinsic fitness effects and should be relatively easy  
380 to study. Loss of the transgene *per se* would be detectable by PCR, and the fitness advantage of revertant  
381 over vaccine could be measured from changes in revertant frequency. The quantitative relevance of an *in*  
382 *vitro* estimate to *in vivo* growth would be unknown, but the measure should allow qualitatively comparing  
383 engineering designs that improve intrinsic vaccine fitness. If vaccine reversion were due to down regulation  
384 of the transgene instead of loss, fitness estimation would require knowing the mutations responsible and  
385 monitoring their frequencies. Use of culture-wide antigen levels to measure fitness might provide a sense  
386 of whether vaccine evolution would lead to reduced antigen levels *in vivo*, but it would be less sensitive in  
387 measuring evolution than is measuring mutation frequencies.

388 *In vitro* assays may be useful in measuring intrinsic fitness effects, but *in vivo* – in the patient – is the  
389 ultimate environment for studying within-host evolution and its effects. Not only are the dynamics of viral  
390 spread different between *in vitro* and *in vivo* environments, but most immune components will be in play  
391 only *in vivo*. Furthermore, those components may vary across tissues within the host. Sampling across this  
392 heterogeneity *in vivo* will be challenging but may be necessary to know whether, when, and where vaccine  
393 evolution is a problem. If revertant remains a minority of the population, we expect that vaccine evolution  
394 can be ignored. Perhaps *in vitro* studies of vaccine evolution will provide most of the information relevant to  
395 *in vivo* evolution, but it is too early to know.

396 We have focused on recombinant vector vaccines that cause acute infections. Necessarily, our recommendations

397 are based on simple models that are caricatures of the complex within-host dynamics of acute infections.  
398 Simple models are appropriate at this stage because of uncertainties at many biological levels, and under  
399 these circumstances simple models frequently generate more robust results than do complex models [42,43].  
400 The generation of innate and adaptive responses can be modeled with different assumptions than used  
401 here, and those alternative processes may affect the conclusions. For example, time-lags in the activation of  
402 cells may dominate the time for the generation of an innate immune response, with virus density having a  
403 consequently smaller role than assumed here (as can be seen in [44] and modeled in [29]). We have modeled  
404 that responses to different antigens are generated independently of each other and do not compete. We have  
405 done so because vaccines are likely to cause relatively mild infections during which the densities of pathogen  
406 and immune cells do not reach sufficiently high levels required for competitive interactions to be important.  
407 The adaptive immune response may be more influenced by recruitment which is followed by a period of  
408 proliferation even in the absence of antigen [45–47]. Both these scenarios would minimize the impact of  
409 evolutionary changes in the vaccine on the amount of immunity generated to the transgene.  
410 Finally, it is easily appreciated that there are realms we do not consider, such as spatial structure [48] and  
411 recombinant vector vaccines based on viruses such as Cytomegalovirus that cause persistent infections [49] or  
412 that are transmissible. Spatial structure may limit the impact of vaccine evolution on immunity (e.g., prevent  
413 mutants from taking over the entire population). In contrast, vaccines that cause persistent infections or are  
414 transmissible are likely to be more severely affected by evolution than are vaccines causing acute infections,  
415 as there is a longer timeframe for evolution to operate.  
416 With so little experience from recombinant vector vaccines, we can merely guess how commonly within-host  
417 evolution will compromise vaccine efficacy. Given that simple steps can be taken to reduce vaccine evolution,  
418 vaccine development programs should at least entertain the possibility that evolution can underlie failure.  
419 Avoiding vaccine evolution may be easier than developing an entirely new vaccine.

## 420 **Appendix: the models**

421 The models used here specify features of viral infections. Some basics include the following:

- 422 1. Two viral types: Only vaccine and wild-type (vector or revertant) are ever present.

423

424 2. Acute infections. Infections are short term because they are subject to control and clearance by any  
425 combination of three factors: resource limitation, innate immunity and adaptive immunity. Further  
426 details not included in this Appendix can be found in Supplements.

## 427 1. Model formulation

### 428 Variables

429 The following table defines the variables used in these equations.

| Term | Description                                                        |
|------|--------------------------------------------------------------------|
| $V$  | Vaccine                                                            |
| $W$  | Wild-type (revertant) vector                                       |
| $R$  | Resource                                                           |
| $X$  | Adaptive immune response specific to recombinant (vaccine) antigen |
| $Y$  | Adaptive immune response to vector/revertant as well as to vaccine |
| $Z$  | Innate immune response (common to vaccine and revertant)           |

### 430 Parameters

431 The following table gives the parameter definitions and values used, except where different values are specified  
432 in figures or supplementary material.

| Abbreviation        | Description                                 | Values                |
|---------------------|---------------------------------------------|-----------------------|
| Intrinsic factors   |                                             |                       |
| $r$                 | rate of growth of $V$                       | 3 per day             |
| $c$                 | cost to having recombinant antigen          | $0 < c < 1$ .         |
| $\mu$               | mutation rate for $V \rightarrow W$         | $0, 10^{-3}, 10^{-6}$ |
| $d$                 | death rate of virus                         | 1                     |
| Resource limitation |                                             |                       |
| $\phi_R$            | resource for half max growth of $W$ and $V$ | 1                     |
| Innate immunity     |                                             |                       |

| Abbreviation       | Description                                         | Values                        |
|--------------------|-----------------------------------------------------|-------------------------------|
| $\sigma$           | rate of stimulation of innate immunity              | $2.7 \times 10^{-5}$          |
| $k_Z$              | killing rate of V due to Z (innate immunity)        | $3 \times 10^{-2}$            |
| $d_Z$              | decay of innate immunity in absence of antigen      | 1 [0 for model 2]             |
| Adaptive immunity  |                                                     |                               |
| s                  | rate of clonal expansion of adaptive immunity       | 3                             |
| $\phi_X$           | antigen for half max growth of adaptive immunity X  | $10^3$                        |
| $\phi_Y$           | antigen for half max growth of adaptive immunity Y  | $10^3$                        |
| $k_X$              | killing rate of V due to X (immunity to insert)     | $10^{-6}$ , various           |
| $k_Y$              | killing rate of V & W due to Y (immunity to vector) | $10^{-6}$ , various           |
| Initial conditions |                                                     |                               |
| $X(0)$             | initial immunity to vaccine antigen                 | 1                             |
| $Y(0)$             | initial immunity to vector antigen                  | 1                             |
| $Z(0)$             | initial innate immunity                             | 0                             |
| $V(0)$             | initial virus                                       | 1                             |
| $W(0)$             | initial revertant                                   | various                       |
| $R(0)$             | initial resource                                    | $2 \times 10^5$ , $10^{20}$ * |

433 \*The higher value of  $R(0)$  is used to eliminate it as a basis for viral clearance.

#### 434 Equations

435 Resources start with a fixed amount and are depleted by vaccine and revertant growth, without replenishment:

$$\frac{dR}{dt} = -rV \frac{R}{\phi_R + R} - r(1+c)W \frac{R}{\phi_R + R} \quad .$$

436 The vaccine virus grows on resource R at rate r, depleted by mutation, death, and all 3 types of immunity:

$$\frac{dV}{dt} = rV \frac{R}{\phi_R + R} - \mu V - dV - (k_X X + k_Y Y + k_Z Z)V \quad .$$

437 Revertant grows on resource  $R$  at rate  $r(1+c)$ , depleted by mutation, death, and 2 types of immunity (not  $X$ ):

$$\frac{dW}{dt} = r(1+c)W \frac{R}{\phi_R + R} + \mu V - dW - (k_Y Y + k_Z Z)W \quad .$$

438 Adaptive immunity specific to vaccine grows according to its present value and a discounted value of the  
439 current vaccine density:

$$\frac{dX}{dt} = sX \frac{V}{\phi_X + V} \quad .$$

440 Adaptive immunity common to vaccine and revertant grows according to its present value and a discounted  
441 value of the current vaccine plus revertant densities:

$$\frac{dY}{dt} = sX \frac{V + W}{\phi_Y + V + W} \quad .$$

442 Innate immunity, also common to vaccine and revertant, grows according to current levels of vaccine and  
443 revertant, with diminishing growth as a limit is approached. Innate immunity also decays:

$$\frac{dZ}{dt} = \sigma(V + W)(100 - Z) - d_Z Z \quad .$$

444 These models follow the usual assumptions of SIR models, except that susceptible hosts (host cells in our case)  
445 are modeled as Resource. As is typical in these models, variables for ‘free’ virus are omitted, an assumption  
446 based on the quasi-steady state approximation (Perelson 2002).

## 447 Literature Cited

- 448 1. Bull JJ. Evolutionary reversion of live viral vaccines: Can genetic engineering subdue it? *Virus Evolution*.  
449 2015;1. doi:10.1093/ve/vev005
- 450 2. Hanley KA. The double-edged sword: How evolution can make or break a live-attenuated virus vaccine.  
451 *Evolution*. 2011;4: 635–643. doi:10.1007/s12052-011-0365-y
- 452 3. DeVries AS, Harper J, Murray A, Lexau C, Bahta L, Christensen J, et al. Vaccine-derived poliomyelitis  
453 12 years after infection in Minnesota. *The New England Journal of Medicine*. 2011;364: 2316–2323.

454 doi:10.1056/NEJMoa1008677

455 4. Bull JJ, Smithson MW, Nuismier SL. Transmissible Viral Vaccines. *Trends in Microbiology*. 2018;26: 6–15.

456 doi:10.1016/j.tim.2017.09.007

457 5. Luring AS, Jones JO, Andino R. Rationalizing the development of live attenuated virus vaccines. *Nature*

458 *biotechnology*. 2010;28: 573–579. doi:10.1038/nbt.1635

459 6. Kenney JL, Volk SM, Pandya J, Wang E, Liang X, Weaver SC. Stability of RNA virus attenuation

460 approaches. *Vaccine*. 2011;29: 2230–2234. doi:10.1016/j.vaccine.2011.01.055

461 7. Condit RC, Williamson A-L, Sheets R, Seligman SJ, Monath TP, Excler J-L, et al. Unique safety issues

462 associated with virus-vectored vaccines: Potential for and theoretical consequences of recombination with

463 wild type virus strains. *Vaccine*. 2016;34: 6610–6616. doi:10.1016/j.vaccine.2016.04.060

464 8. Kochhar S, Excler J-L, Bok K, Gurwith M, McNeil MM, Seligman SJ, et al. Defining the interval for

465 monitoring potential adverse events following immunization (AEFIs) after receipt of live viral vectored

466 vaccines. *Vaccine*. 2018; doi:10.1016/j.vaccine.2018.08.085

467 9. Logg CR, Logg A, Tai CK, Cannon PM, Kasahara N. Genomic stability of murine leukemia viruses

468 containing insertions at the Env-3' untranslated region boundary. *Journal of Virology*. 2001;75: 6989–6998.

469 doi:10.1128/JVI.75.15.6989-6998.2001

470 10. Duch M, Carrasco ML, Jespersen T, Hansen BD, Pedersen FS. Transgene stability for three replication-

471 competent murine leukemia virus vectors. *Gene*. 2004;329: 61–69. doi:10.1016/j.gene.2003.12.032

472 11. Yu L, Zhou Y, Jiang Y, Tong W, Yang S, Gao F, et al. Construction and in vitro evaluation of a recombinant

473 live attenuated PRRSV expressing GM-CSF. *Virology Journal*. 2014;11: 201. doi:10.1186/s12985-014-0201-4

474 12. Li Z, Wang J, Yuan D, Wang S, Sun J, Yi B, et al. A recombinant canine distemper virus expressing

475 a modified rabies virus glycoprotein induces immune responses in mice. *Virus Genes*. 2015;50: 434–441.

476 doi:10.1007/s11262-015-1169-x

477 13. Li Z, Wang G, Wang Y, Zhang C, Wang X, Huang B, et al. Rescue and evaluation of a recombinant

478 PRRSV expressing porcine Interleukin-4. *Virology Journal*. 2015;12: 185. doi:10.1186/s12985-015-0380-7

479 14. Malczyk AH, Kupke A, Prüfer S, Scheuplein VA, Hutzler S, Kreuz D, et al. A highly immunogenic and

480 protective Middle East Respiratory Syndrome coronavirus vaccine based on a recombinant measles virus



- 481 vaccine platform. *Journal of Virology*. 2015;89: 11654–11667. doi:10.1128/JVI.01815-15
- 482 15. Yu H, Huang L, Zhang Y, Hu L, Wang S, Li J, et al. An attenuated EMCV-HB10 strain acts  
483 as a live viral vector delivering a foreign gene. *The Journal of General Virology*. 2016;97: 2280–2290.  
484 doi:10.1099/jgv.0.000541
- 485 16. Lokugamage N, Ikegami T. Genetic stability of Rift Valley fever virus MP-12 vaccine during serial  
486 passages in culture cells. *NPJ vaccines*. 2017;2. doi:10.1038/s41541-017-0021-9
- 487 17. Alharbi NK. Poxviral promoters for improving the immunogenicity of MVA delivered vaccines. *Human*  
488 *Vaccines & Immunotherapeutics*. 2018; 1–7. doi:10.1080/21645515.2018.1513439
- 489 18. Ren J, Zhang L, Cheng P, Zhang F, Liu Z, Tikoo SK, et al. Generation of infectious clone of bovine  
490 adenovirus type I expressing a visible marker gene. *Journal of Virological Methods*. 2018;261: 139–146.  
491 doi:10.1016/j.jviromet.2018.08.020
- 492 19. Tamura T, Fukuhara T, Uchida T, Ono C, Mori H, Sato A, et al. Characterization of Recombinant  
493 Flaviviridae Viruses Possessing a Small Reporter Tag. *Journal of Virology*. 2018;92. doi:10.1128/JVI.01582-17
- 494 20. Willemsen A, Carrasco JL, Elena SF, Zwart MP. Going, going, gone: Predicting the fate of genomic  
495 insertions in plant RNA viruses. *Heredity*. 2018;121: 499–509. doi:10.1038/s41437-018-0086-x
- 496 21. Knowles MK, Roberts D, Craig S, Sheen M, Nadin-Davis SA, Wandeler AI. In vitro and in vivo genetic  
497 stability studies of a human adenovirus type 5 recombinant rabies glycoprotein vaccine (ONRAB). *Vaccine*.  
498 2009;27: 2662–2668. doi:10.1016/j.vaccine.2009.02.074
- 499 22. Schmerer M, Molineux IJ, Ally D, Tyerman J, Cecchini N, Bull JJ. Challenges in predicting the evolutionary  
500 maintenance of a phage transgene. *Journal of Biological Engineering*. 2014;8: 21. doi:10.1186/1754-1611-8-21
- 501 23. Janeway CA, Medzhitov R. Innate immune recognition. *Annual Review of Immunology*. 2002;20: 197–216.  
502 doi:10.1146/annurev.immunol.20.083001.084359
- 503 24. Perelson AS. Modelling viral and immune system dynamics. *Nature Reviews Immunology*. 2002;2: 28–36.  
504 doi:10.1038/nri700
- 505 25. Baccam P, Beauchemin C, Macken CA, Hayden FG, Perelson AS. Kinetics of influenza A virus infection  
506 in humans. *Journal of Virology*. 2006;80: 7590–7599. doi:10.1128/JVI.01623-05
- 507 26. Saenz RA, Quinlivan M, Elton D, Macrae S, Blunden AS, Mumford JA, et al. Dynamics of influenza

- 508 virus infection and pathology. *J Virol.* 2010;84: 3974–83. doi:10.1128/JVI.02078-09
- 509 27. Pawelek KA, Huynh GT, Quinlivan M, Cullinane A, Rong L, Perelson AS. Modeling within-host  
510 dynamics of influenza virus infection including immune responses. *PLoS Comput Biol.* 2012;8: e1002588.  
511 doi:10.1371/journal.pcbi.1002588
- 512 28. Moore J, Ahmed H, Jia J, Akondy R, Ahmed R, Antia R. What controls the acute viral infection following  
513 yellow fever vaccination? *Bull Math Biol.* 2018;80: 46–63. doi:10.1007/s11538-017-0365-3
- 514 29. Ahmed H, Moore J, Manicassamy B, Garcia- Sastre A, Handel A, Antia R. Mathematical analysis of  
515 a mouse experiment suggests little role for resource depletion in controlling influenza infection within host.  
516 arXiv e-prints. 2017; arXiv:1705.02565.
- 517 30. Takeuchi O, Akira S. Recognition of viruses by innate immunity. *Immunological Reviews.* 2007;220:  
518 214–224. doi:10.1111/j.1600-065X.2007.00562.x
- 519 31. Antia R, Koella JC. A model of non-specific immunity. *Journal of Theoretical Biology.* 1994;168: 141–150.  
520 doi:10.1006/jtbi.1994.1094
- 521 32. Iwasaki A, Medzhitov R. Regulation of adaptive immunity by the innate immune system. *Science.*  
522 2010;327: 291–5. doi:10.1126/science.1183021
- 523 33. Antia R, Levin BR, May RM. Within-host population-dynamics and the evolution and maintenance of  
524 microparasite virulence. *American Naturalist.* 1994;144: 457–472.
- 525 34. Nowak MA, May R. *Virus dynamics mathematical principles of immunology and virology.* Oxford  
526 University Press; 2001.
- 527 35. De Boer RJ, Perelson AS. Towards a general function describing t cell proliferation. *J Theor Biol.*  
528 1995;175: 567–76.
- 529 36. Regoes RR, Antia R, Garber DA, Silvestri G, Feinberg MB, Staprans SI. Roles of target cells and  
530 virus-specific cellular immunity in primary simian immunodeficiency virus infection. *J Virol.* 2004;78:  
531 4866–75.
- 532 37. Akondy RS, Johnson PLF, Nakaya HI, Edupuganti S, Mulligan MJ, Lawson B, et al. Initial viral load  
533 determines the magnitude of the human CD8 T cell response to yellow fever vaccination. *Proc Natl Acad Sci*

- 534 U S A. 2015;112: 3050–5. doi:10.1073/pnas.1500475112
- 535 38. Havenga M, Vogels R, Zuijdgheest D, Radosevic K, Mueller S, Sieuwerts M, et al. Novel replication-  
536 incompetent adenoviral B-group vectors: High vector stability and yield in PER.C6 cells. *The Journal of*  
537 *General Virology*. 2006;87: 2135–2143. doi:10.1099/vir.0.81956-0
- 538 39. Wang Z, Martinez J, Zhou W, La Rosa C, Srivastava T, Dasgupta A, et al. Modified H5 promoter  
539 improves stability of insert genes while maintaining immunogenicity during extended passage of genetically  
540 engineered MVA vaccines. *Vaccine*. 2010;28: 1547–1557. doi:10.1016/j.vaccine.2009.11.056
- 541 40. Kew OM. Reaching the last one per cent: Progress and challenges in global polio eradication. *Current*  
542 *opinion in virology*. 2012;2: 188–198. doi:10.1016/j.coviro.2012.02.006
- 543 41. Basinski AJ, Varrelman TJ, Smithson MW, May RH, Remien CH, Nuismer SL. Evaluating the promise  
544 of recombinant transmissible vaccines. *Vaccine*. 2018;36: 675–682. doi:10.1016/j.vaccine.2017.12.037
- 545 42. Hilborn R, Mangel M. *The ecological detective : Confronting models with data*. Princeton, N.J.: Princeton  
546 University Press; 1997.
- 547 43. May RM. Uses and abuses of mathematics in biology. *Science*. 2004;303: 790–3.
- 548 44. Manicassamy B, Manicassamy S, Belicha-Villanueva A, Pisanelli G, Pulendran B, García-Sastre A.  
549 Analysis of in vivo dynamics of influenza virus infection in mice using a gfp reporter virus. *Proc Natl Acad*  
550 *Sci U S A*. 2010;107: 11531–6. doi:10.1073/pnas.0914994107
- 551 45. Kaech SM, Ahmed R. Memory cd8+ t cell differentiation: Initial antigen encounter triggers a developmental  
552 program in naive cells. *Nat Immunol*. 2001;2: 415–22.
- 553 46. Stipdonk MJ van, Lemmens EE, Schoenberger SP. Naive ctls require a single brief period of antigenic  
554 stimulation for clonal expansion and differentiation. *Nat Immunol*. 2001;2: 423–9.
- 555 47. Antia R, Bergstrom CT, Pilyugin SS, Kaech SM, Ahmed R. Models of cd8+ responses: 1. what is the  
556 antigen-independent proliferation program. *J Theor Biol*. 2003;221: 585–98.
- 557 48. Gallagher ME, Brooke CB, Ke R, Koelle K. Causes and consequences of spatial within-host viral spread.  
558 *Viruses*. 2018;10: 627. doi:10.3390/v10110627
- 559 49. Arinaminpathy N, Lavine JS, Grenfell BT. Self-boosting vaccines and their implications for herd immunity.  
560 *Proceedings of the National Academy of Sciences of the United States of America*. 2012;109: 20154–20159.

561 doi:10.1073/pnas.1209683109
